# Supplementary material for: Green synthesis of garlic peel-based carbon dots for detection of metal ions and printable anti-counterfeiting applications
Source: Royal Society of Chemistry journal article supplement (doi:10.1039/d5nj03714j), 2025-12-22
Supplement: d5nj03714j1.pdf [file d5nj03714j1.pdf]

## Supplementary Material

*for*

### Green Synthesis of Garlic peel-based Carbon Dots for Detection of Metal Ions and Printable Anti-counterfeiting Applications

Yafeng Deng\*, Shaoyun Huang, Jianping Ye, Pengcheng Chang, Min Li, Weiying Chen

*(School of New Energy, Jingchu University of Technology, Jingmen 448000, China)*

#### Experimental section

##### ***Construction of ratio-type probes and smartphone-assisted visual detection***

After mixing rhodamine B with G-CDs in different proportions, a series of solutions with different fluorescence colors can be obtained (volume ratios of rhodamine B to CDs are 1:1, 1:2, 1:3, 1:4, 1:5, 1:6, 1:7, 1:8, 1:9, and 1:10). A specific ratio was selected as the probe solution. To make the fluorescence color change more significant after adding  $\text{Cr}^{3+}$  to the probe solution, a 1: 3 ratio was selected for subsequent detection experiments. Mix the prepared probe solution with the  $\text{Cr}^{3+}$  solution and observe under 365 nm ultraviolet light. With the addition of  $\text{Cr}^{3+}$ , the fluorescence color of the probe solution will change. At the same time, take photos and record them with a smartphone. Import the captured photos into the “Color Selector” App to obtain RGB values, and construct the relationship between the change in solution color (RGB values) and ion concentration.

##### ***Testing of Fluorescent Ink Performance and Printing Compatibility***

***Drying time test:*** The dryness of ink was tested by the friction test. By observing the transfer of ink on the pattern surface printed through friction, the degree of ink drying can be determined. First, prepare the printed samples and record the moment when they were printed on non-fluorescent paper. Then, conduct the drying test at different time points after printing (such as 30 seconds, 60 seconds, 120 seconds). Place the printed sample on a glass plate, then cover the printed surface with non-fluorescent paper. Apply a fixed pressure and perform back-and-forth friction. Observe whether any ink adheres to the non-fluorescent paper and record the result. To keep the experimental results accurate, repeat the above experiments and take the average value as the experimental results.

***Test of ink viscosity performance:*** Test by rotary viscometer. First, assemble the instrument and prepare the sample ink to be tested. Select the 28th rotor, then introduce the sample ink into the sample cylinder and immerse the test rotor in the ink. Data needs to be measured and recorded multiple times.

***Test of ink transfer rate:*** Prepare non-fluorescent paper (filter paper and weighing paper), and calculate the ink transfer rate by measuring the weight difference of the substrate before and after printing. The ink transfer rate refers to the ratio of the amount of ink transferred to the surface of the substrate and the amount of ink applied to the plate. It can be expressed by the formula:  $F = y/x * 100\%$  (where F represents the ink transfer rate, y represents the ink amount transferred onto the substrate surface, and x represents the ink amount applied to the printing plate).

***Test of print gloss:*** The glossiness of the printed materials is tested using a gloss meter. Specular reflection and diffuse reflection will occur when the light hits the surface at a specific angle. Glossiness is the ratio of specular reflection light intensity to incident light intensity. The higher the ratio, the higher the glossiness. Turn on the gloss meter and wait for the instrument to complete the self-check. Then, select the test angle of 75° for the test. The

square pattern (4 cm × 4cm) printed by a 200 mesh screen printing plate was selected for sample measurement. At the same time, the surface glossiness of the paper without printed ink was measured as a blank control.

**Test of rub resistance:** The printed materials were tested using a friction resistance testing machine. The friction head moves back and forth in a straight line on the surface of the sample, which is judged by observing the fluorescent effect of the printed matter under UV light. After assembling the wear resistance test unit, fix the sample on the friction head. Then, attach weights (a 500 g weight and two 250 g weights) to the friction head (the friction head weighs 1000 g). Set the number of reciprocating cycles of the testing machine (43 times, 60 times, 250 times) and then start the machine to conduct the test. After each experiment, take photos and record the number of trips, and observe the wear of the sample surface.

**Test of fluorescent anti-counterfeiting:** The fluorescent ink was printed on non-fluorescent paper using screen printing (at 80 mesh and 100 mesh), and the fluorescent anti-counterfeiting effect was observed under natural light and 365 nm ultraviolet light, and photos were taken for preservation.

## Results and Discussion

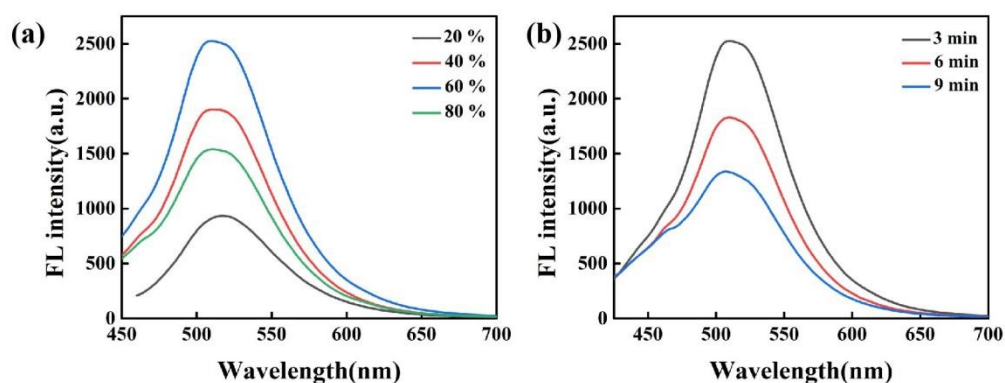

Figure S1. Fluorescence emission spectrum of G-CDs under different reaction conditions: (a) microwave reaction time; (b) microwave reaction power

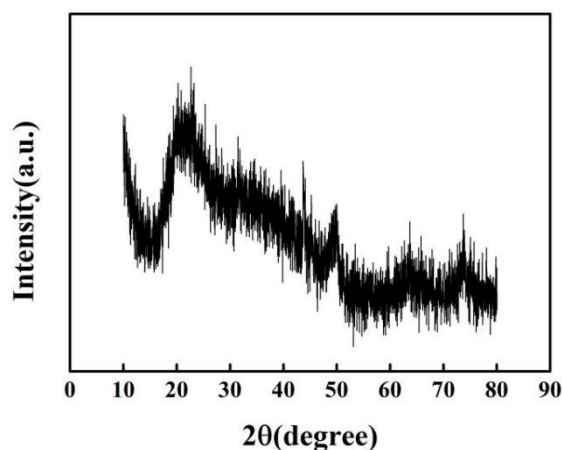

Figure S2. XRD spectrum of G-CDs

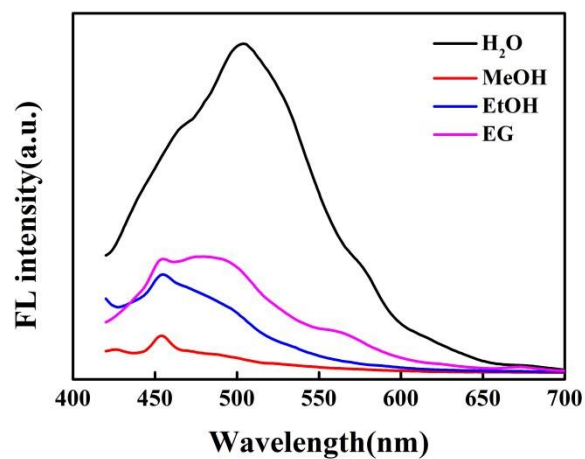

Figure S3. Emission spectra of G-CDs in different Organic solvents

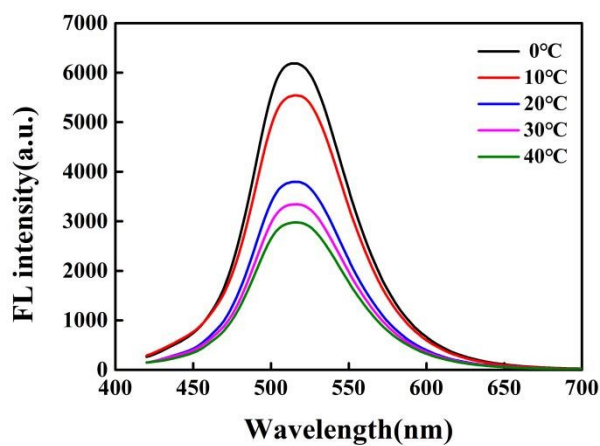

Figure S4. Emission spectra of G-CD in water at different temperatures

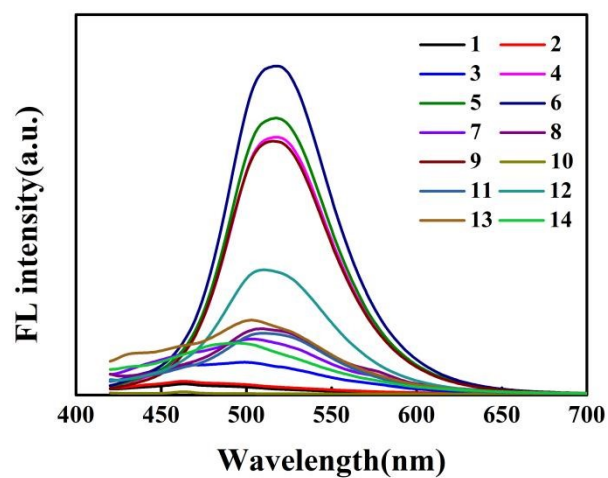

Figure S5. Emission spectra of G-CD in different pH solutions

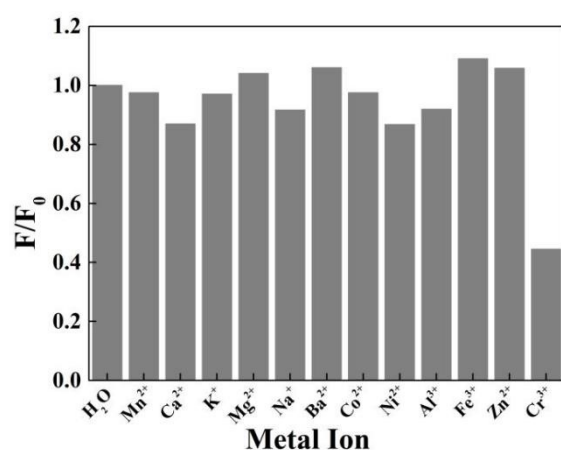

Figure S6. Ion selectivity studies of the G-CDs

Table S1: Comparison of different CDs sensors for the determination of Cr<sup>3+</sup>

| Precursor          | synthetic method   | emission | QY     | LOD          | Detection range   | Ref. |
|--------------------|--------------------|----------|--------|--------------|-------------------|------|
| natural kelp       | hydrothermal       | 446 nm   | 20.5%  | 0.52 $\mu$ M | 0.01 - 50 $\mu$ M | [1]  |
| citric acid;       | pyrolysis          | 450 nm   | 15%    | 52.2 nM      | 5-100 nM          | [2]  |
| Houttuynia cordata |                    |          |        |              |                   |      |
| Thiourea; TA;      | Solvothermal       | 418 nm   | -      | 0.08 $\mu$ M | 0-14 $\mu$ M      | [3]  |
| MPD                |                    |          |        |              |                   |      |
| spinach juice      | hydrothermal       | -        | 8.746% | 1.38 $\mu$ M | -                 | [4]  |
| sucrose            | acid carbonization | 560 nm   | 0.18 % | 24.6 $\mu$ M | 0-200 $\mu$ M     | [5]  |
| succinic acid;     | microwave          | 407 nm   | 36.40% | 0.17 $\mu$ M | 0-45 $\mu$ M      | [6]  |
| sodium thiosulfate | irradiation        |          |        |              |                   |      |
| wine lees          | heat               | -        | -      | -            | 0.1-80 $\mu$ M    | [7]  |
| citric acid ;      | hydrothermal       | 440 nm   | -      | 27 nM        | 0.1-6.0 $\mu$ M   | [8]  |
| ethylenediamine    |                    |          |        |              |                   |      |
| Garlic peel        | microwave          | 520 nm   | -      | 1.69 $\mu$ M | 20-150 $\mu$ M    | This |
|                    | irradiation        |          |        |              |                   | work |

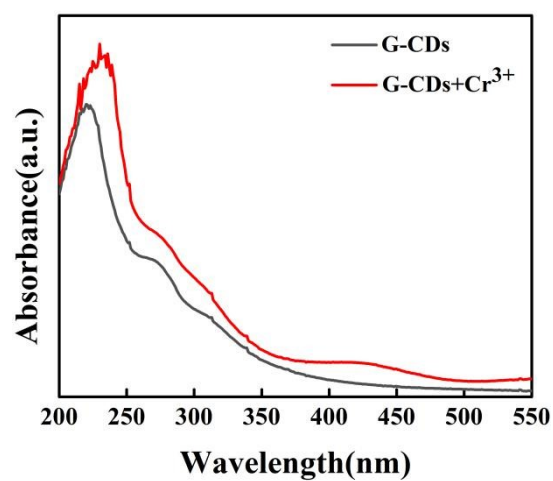

Figure S7. Ultraviolet-visible absorption spectra with and without  $\text{Cr}^{3+}$

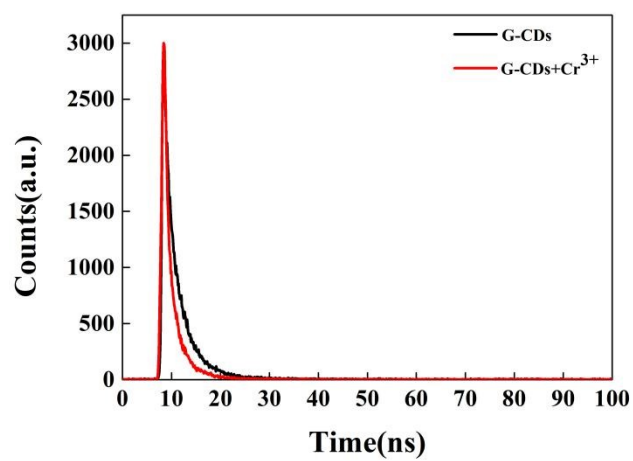

Figure S8. Fluorescence decay of G-CDs in the absence and presence of  $\text{Cr}^{3+}$

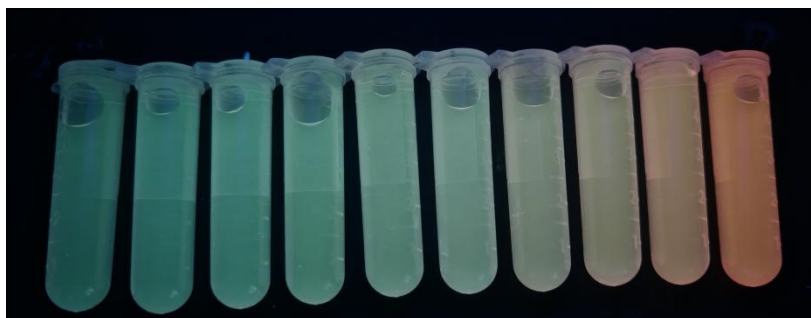

Figure S9. Fluorescence photos of mixed solutions of Rhodamine B/G-CDs with different ratios under ultraviolet light

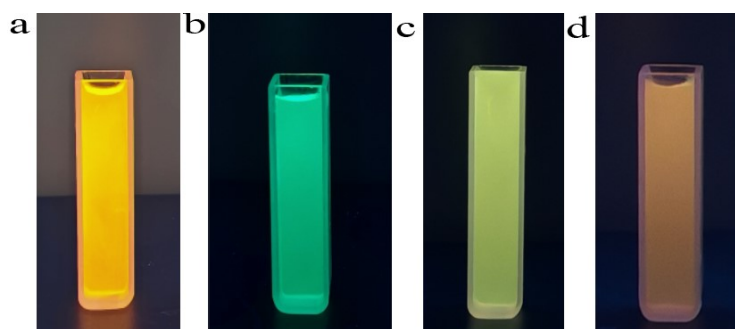

Figure S10. Fluorescent photos of samples: (a) Rhodamine B solution; (b) G-CDs solution; (c) The mixture solution of rhodamine B and G-CDs; (d) Rhodamine B/G-CDs and  $\text{Cr}^{3+}$  mixed solution

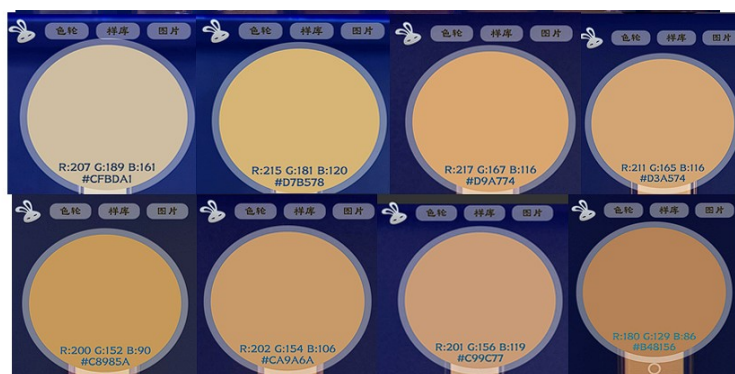

Figure S11. The RGB values of the photos of the sample being tested by the probe solution recognized by the mobile phone software under the ultraviolet light

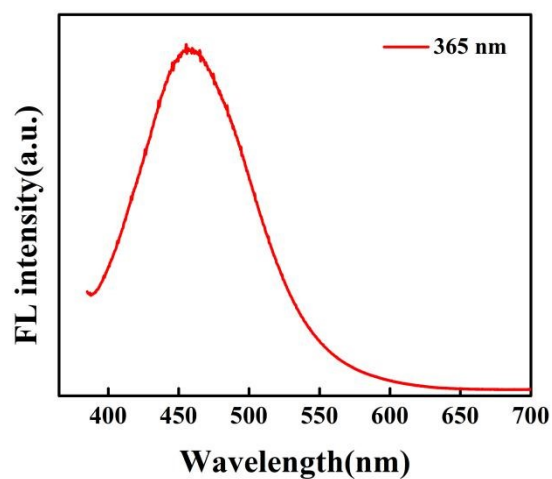

Figure S12. Emission spectra of G-CDs fluorescent powder under 365 nm excitation light

Table S2. Drying time of fluorescent ink on non-fluorescent paper

| The drying time of fluorescent ink on non-fluorescent paper |             |     |     |     |     |     | Average value |
|-------------------------------------------------------------|-------------|-----|-----|-----|-----|-----|---------------|
| Filter                                                      | Drying time | 636 | 658 | 639 | 616 | 618 | 633.4         |

|                |                 |     |     |     |     |     |       |
|----------------|-----------------|-----|-----|-----|-----|-----|-------|
| Paper          | (s)             |     |     |     |     |     |       |
| Weighing paper | Drying time (s) | 153 | 138 | 135 | 160 | 143 | 145.8 |

Table S3. The ink transfer rate of fluorescent ink on non-fluorescent paper

| The ink transfer rate of fluorescent ink on non-fluorescent paper |                                         |         |         |         |         |         | Average value |
|-------------------------------------------------------------------|-----------------------------------------|---------|---------|---------|---------|---------|---------------|
| Filter Paper                                                      | Amount of ink on the printing plate (x) | 0.241 g | 0.230 g | 0.253 g | 0.246 g | 0.232 g | 0.2404 g      |
|                                                                   | Amount of ink transferred (y)           | 0.032 g | 0.031 g | 0.033 g | 0.034 g | 0.033 g | 0.0326 g      |
|                                                                   | Transfer rate (F)                       | 13.3%   | 13.5%   | 13.1%   | 13.8%   | 14.2%   | 13.58%        |
| Weighing paper                                                    | Amount of ink on the printing plate (x) | 0.243 g | 0.229 g | 0.252 g | 0.248 g | 0.222 g | 0.193 g       |
|                                                                   | Amount of ink transferred (y)           | 0.031 g | 0.029 g | 0.031 g | 0.032 g | 0.030 g | 0.0306 g      |
|                                                                   | Transfer rate (F)                       | 12.7%   | 12.6%   | 12.3%   | 12.9%   | 13.5%   | 12.8%         |

Table S4. The glossiness of fluorescent ink on non-fluorescent paper

| non-fluorescent paper (GU) |            |      |      |      |      |      | Average value |
|----------------------------|------------|------|------|------|------|------|---------------|
| Weighing paper             | Crosswise  | 28.9 | 28.7 | 28.6 | 30.6 | 29.1 | 29.18         |
|                            | Lengthways | 30.6 | 31.1 | 30.9 | 31.5 | 30.4 | 30.9          |
| Filter Paper               | Crosswise  | 3.6  | 3.8  | 3.7  | 3.5  | 3.6  | 3.64          |
|                            | Lengthways | 4.4  | 4.3  | 4.3  | 4.3  | 4.4  | 4.34          |
| printed matter (GU)        |            |      |      |      |      |      |               |
| Weighing paper             | Crosswise  | 8.3  | 8.2  | 8.1  | 8.5  | 8.6  | 8.34          |
|                            | Lengthways | 9.1  | 9.2  | 9.0  | 9.3  | 9.3  | 9.18          |
| Filter Paper               | Crosswise  | 4.3  | 4.2  | 4.1  | 4.3  | 4.4  | 4.26          |
|                            | Lengthways | 5.5  | 5.6  | 5.7  | 5.9  | 5.4  | 5.62          |

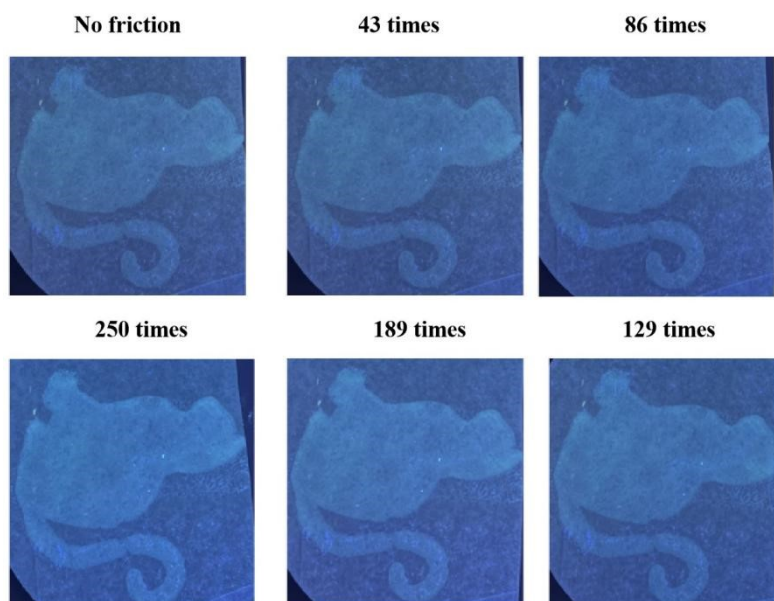

Figure S13. Photos of the friction resistance test samples

## References

- [1] Feng, Shouai, et al. Feasibility of detection valence speciation of Cr (III) and Cr (VI) in environmental samples by spectrofluorimetric method with fluorescent carbon quantum dots[J]. *Spectrochimica acta part A: Molecular and biomolecular spectroscopy* 212 (2019): 286-292.
- [2] Nugroho, David, et al. Ultra-trace analysis of chromium ions ( $\text{Cr}^{3+}/\text{Cr}^{6+}$ ) in water sample using selective fluorescence turn-off sensor with natural carbon dots mixed graphene quantum dots nanohybrid composite synthesis by pyrolysis[J]. *Arabian Journal of Chemistry* 17.1 (2024): 105443.
- [3] Tian, Yi, et al. Carbon dot nanoarchitectonics with high photoluminescence for efficient Cr ion sensors[J]. *Surfaces and Interfaces* 52 (2024): 104926.
- [4] Kaur H, Sareen S, Mutreja V, et al. Spinach-derived carbon dots for the turn-on detection of chromium ions ( $\text{Cr}^{3+}$ )[J]. *Journal of Inorganic and Organometallic Polymers and Materials*[J]. 2023, 33(12): 3703-3715.
- [5] Chang M M F, Ginjom I R, Ngu-Schwemlein M, et al. Synthesis of yellow fluorescent carbon dots and their application to the determination of chromium (III) with selectivity improved by pH tuning[J]. *Microchimica Acta*, 2016, 183(6): 1899-1907.
- [6] Kamali S R, Chen C N, Agrawal D C, et al. Sulfur-doped carbon dots synthesis under microwave irradiation as turn-off fluorescent sensor for Cr (III)[J]. *Journal of Analytical Science and Technology*, 2021, 12(1): 48.
- [7] Tang J, Zhang J, Zhang W, et al. Modulation of red-light emission from carbon quantum dots in acid-based environment and the detection of chromium (III) ions[J]. *Journal of Materials Science & Technology*, 2021, 83: 58-65.
- [8] Lu H, Xu S, Liu J. One pot generation of blue and red carbon dots in one binary solvent system for dual channel detection of  $\text{Cr}^{3+}$  and  $\text{Pb}^{2+}$  based on ion imprinted fluorescence polymers[J]. *ACS sensors*, 2019, 4(7): 1917-1924.
